# Supplementary material for: Criteria for assessing the adaptive changes in mixed martial arts (MMA) athletes of strike fighting style in different training load regimes
Source: PeerJ. 2022 Aug 3;10:e13827. doi: 10.7717/peerj.13827 (PMC9356583; doi:10.7717/peerj.13827)
Supplement: Data S1 — These data were used for statistical analysis. [file peerj-10-13827-s001.xlsx]

## Sheet: Лист1
	The results of strength testing (1RM) group A participants during the experiment (n=20)									Observation term, months
										Initial data	1	2
										a	b	c
		Bench press on the Smith simulator			Block thrust behind the head			Legs press in the simulator lying
		a	b	c	a	b	c	a	b	c
	1)	60	75	100	70	75	80	130	160	200
	2)	75	75	90	75	75	82.5	100	110	130
	3)	65	72.5	85	72.5	75	85	130	165	190
	4)	52	65	80	65	75	85	100	135.5	185
	5)	60	70	82.5	70	70	75	135	167.5	187.5
	6)	50	55	60	55	62.5	67.5	140	150	160
	7)	62.5	80	92.5	65	75	80	130	165	200
	8)	70	82.5	90	70	75	77.5	100	115	130
	9)	55	65	75	60	70	75	135	175	190
	10)	50	60	65	50	62.5	65	120	150	160
	11)	60	77.5	95	65	70	75	125	155	190
	12)	72.5	80	90	70	75	82.5	90	110	125
	13)	55	70	80	65	70	75	130	170	200
	14)	60	75	85	60	75	80	100	130	170
	15)	65	80	90	60	70	75	125	167.5	195
	16)	65	75	87.5	67.5	75	80	95	115	130
	17)	60	72.5	80	60	67.5	75	100	140	170
	18)	70	77.5	85	65	77.5	82.5	100	120	150
	19)	67.5	85	97.5	70	80	85	120	150	200
	20)	75	80	90	70	75	80	100	120	130

## Sheet: Лист2
	The results of strength testing (1RM) group B participants during the experiment (n=20)										Observation term, months
											Initial data	1	2
											a	b	c
		Bench press on the Smith simulator			Block thrust behind the head			Legs press in the simulator lying
		a	b	c	a	b	c	a	b	c
	1)	52.5	62.5	77.5	50	62.5	70	125	170	195
	2)	75	80	92.5	75	75	80	145	170	215
	3)	60	65	75	60	65	75	80	120	160
	4)	50	60	75	50	65	77.5	130	165	200
	5)	70	80	90	65	65	75	155	200	240
	6)	60	75	90	60	75	80	130	185	220
	7)	55	67.5	75	50	60	75	100	155	185
	8)	70	85	95	60	72.5	82.5	145	210	230
	9)	55	80	95	60	75	87.5	135	175	200
	10)	50	65	75	50	55	65	100	155	185
	11)	62.5	75	90	65	75	85	130	160	190
	12)	60	72.5	82.5	60	75	75	110	170	200
	13)	65	75	85	60	70	77.5	110	145	170
	14)	57.5	67.5	75	52.5	62.5	75	115	150	175
	15)	70	85	95	60	75	85	130	175	210
	16)	60	80	92.5	60	65	70	110	160	200
	17)	65	82.5	95	65	75	80	120	180	230
	18)	75	87.5	90	65	75	85	160	200	220
	19)	52.5	65	75	62.5	65	70	95	120	175
	20)	65	82.5	95	70	80	85	125	175	225

## Sheet: Лист3
	The number of accurate hits on a stationary manikin for 30 s, group A participants during the study, n = 20															Observation term, months
																Initial data	1	2
					Control exercises											a	b	c
			Front kick			Side kick			Reverse side kick			Roundhouse kick
		a	b	c	a	b	c	a	b	c	a	b	c
	1)	14	15	15	17	18	18	16	17	17	17	18	18
	2)	14	13	14	18	19	19	17	17	18	18	19	19
	3)	14	14	14	19	18	19	16	16	16	19	18	19
	4)	13	13	13	19	20	20	15	17	17	18	18	18
	5)	14	15	15	17	18	18	17	17	17	17	18	19
	6)	13	14	14	19	19	19	16	16	16	19	19	19
	7)	14	14	14	19	18	18	18	17	18	19	18	18
	8)	14	14	14	18	19	19	16	16	17	18	19	18
	9)	16	15	15	20	20	20	17	18	18	19	19	19
	10)	17	17	16	19	20	20	16	16	16	18	18	18
	11)	14	15	15	18	19	18	16	17	17	17	18	18
	12)	16	15	16	19	19	19	17	17	18	18	19	19
	13)	14	14	14	19	20	19	16	16	16	19	18	19
	14)	15	15	15	20	20	20	15	17	17	18	18	18
	15)	15	15	16	19	18	19	17	17	17	17	18	19
	16)	13	14	14	19	18	18	16	16	16	18	19	19
	17)	14	14	14	19	20	20	18	17	17	19	18	18
	18)	14	14	14	17	18	18	16	16	17	18	19	18
	19)	13	13	13	18	19	19	17	18	18	18	19	19
	20)	14	15	14	19	18	19	16	17	16	17	18	18

## Sheet: Лист4
	The number of accurate hits on a stationary manikin for 30 s, group B participants during the study, n = 20															Observation term, months
																Initial data	1	2
					Control exercises											a	b	c
			Front kick			Side kick			Reverse side kick			Roundhouse kick
		a	b	c	a	b	c	a	b	c	a	b	c
	1)	13	15	17	18	19	20	16	17	18	17	18	20
	2)	14	13	15	18	19	21	17	18	18	18	19	20
	3)	14	15	16	19	18	19	16	16	19	19	18	19
	4)	13	13	13	19	20	21	16	17	18	18	18	19
	5)	14	15	15	17	18	18	17	17	19	18	18	21
	6)	14	14	16	19	19	20	16	18	18	19	19	20
	7)	14	14	14	19	18	18	17	17	19	19	18	20
	8)	14	15	17	20	19	21	16	18	18	18	19	20
	9)	15	15	17	18	20	20	17	19	18	19	19	21
	10)	15	17	17	19	20	21	16	16	19	18	19	21
	11)	14	15	17	18	19	18	16	18	20	17	18	20
	12)	16	15	16	19	19	19	17	17	18	18	19	20
	13)	14	15	16	19	20	20	16	17	19	19	19	21
	14)	15	15	15	18	20	20	17	18	17	18	18	19
	15)	15	15	16	19	18	19	17	17	19	18	19	21
	16)	14	14	14	18	20	21	16	16	18	18	20	20
	17)	13	15	17	17	20	20	18	17	19	19	18	20
	18)	14	14	14	18	18	18	16	17	18	18	19	20
	19)	13	14	16	18	19	21	17	18	18	18	19	21
	20)	14	15	17	19	18	21	16	17	19	17	18	21

## Sheet: Лист5
	The results of bioimpedancemetry in group A athletes during the study, n = 20												Observation term, months
													Initial data	1	2
													a	b	c
		BF (body fat, %)			FFM (fat-free mass, kg)			BCM (body cell mass, %)			BMI (body mass index, cond. units)			DCW (dry cell weight, kg)
		a	b	c	a	b	c	a	b	c	a	b	c	a	b	c
	1)	15.89	17.07	8.13	76.54	75.47	82.68	64.6	65.53	65.7	29.94	24.94	24.67	12.68	12.68	13.6
	2)	11.55	13.75	9.45	64.57	62.96	67.01	63.56	68.85	62.07	23.04	23.04	23.36	10.63	11.28	10.84
	3)	7.52	9.27	6.49	63.08	63.09	62.82	62.2	66.41	62.07	21.2	21.8	21.2	10.7	11.42	10.79
	4)	9.9	7.36	7.43	65.77	67.63	67.31	65	63.1	64.29	21.1	21.1	20.23	10.96	10.94	11.1
	5)	6.89	7.01	7.19	62.85	63.08	64.04	56.53	58.96	63.69	20.38	20.38	20.38	9.11	9.93	10.46
	6)	7.84	13.16	8.83	64.51	62.96	67.01	64.56	69.85	63.07	22.09	22.88	23.2	10.69	11.2	10.82
	7)	14.2	15.4	14.44	76.36	75.29	75.29	63.6	64.52	64.52	25.18	25.18	24.9	12.65	12.65	12.65
	8)	10.61	14.04	10.35	64.36	62.75	66.79	64.56	68.89	63.07	23.51	23.84	24.33	10.65	11.24	10.8
	9)	8.58	8.88	8.49	62.2	63.79	63.14	56.53	63.69	64.67	21.15	21.62	21.78	9.07	10.42	10.47
	10)	7.78	8.75	11.66	61.79	62.96	62.32	56.55	63.69	64.67	24.02	24.74	25.46	8.96	10.28	10.33
	11)	12.89	12.45	14.44	74.66	73.29	73.29	62.4	63.52	63.49	23.62	24.33	24.9	12.7	12.65	12.65
	12)	17.49	21.07	15.99	64.36	62.75	66.79	64.56	69.85	63.07	25.47	25.96	25.96	10.65	11.24	10.8
	13)	17.89	16.36	18.22	62.4	64.82	63.79	56.53	48.96	63.69	24.82	24.46	24.62	9.04	8.14	10.42
	14)	7.47	11.06	6.65	64.77	63.15	67.21	64.56	69.8	63.17	21.37	21.67	21.98	10.72	11.31	10.87
	15)	9.95	10.48	12.74	76.09	76.09	72.02	64.63	64.58	65.52	24.96	25.11	25.4	12.6	12.61	12.6
	16)	15.32	17.43	13.26	64.36	62.75	66.79	64.56	69.81	63.12	24.82	24.82	25.14	10.65	11.24	10.8
	17)	12.21	13.69	15.87	75.95	75.95	74.88	64.27	64.6	65.49	25.96	26.57	26.87	12.58	12.58	12.58
	18)	12.57	15.88	11.64	64.7	63.09	67.15	64.59	69.75	62.95	22.84	23.15	23.46	10.71	11.3	10.86
	19)	18.07	16.93	16.18	76.42	76.42	75.35	62.47	62.59	62.52	26.32	25.76	25.2	12.66	12.66	12.66
	20)	14.09	15.11	12.03	64.43	62.82	66.86	64.62	69.37	63.22	24.21	23.89	25.54	10.67	11.25	10.81

## Sheet: Лист6
	The results of bioimpedancemetry in group B athletes during the study, n = 20												Observation term, months
													Initial data	1	2
													a	b	c
		BF (body fat, %)			FFM (fat-free mass, kg)			BCM (body cell mass, %)			BMI (body mass index, cond. units)			DCW (dry cell weight, kg)
		a	b	c	a	b	c	a	b	c	a	b	c	a	b	c
	1)	12.17	9.26	9.26	63.24	65.33	65.33	64.1	62.5	62.4	22.72	22.72	22.72	10.29	10.3	10.37
	2)	23.86	22.01	20.69	61.82	63.17	64.24	64.74	63.55	62.73	27.6	27.6	27.6	10.26	10.29	10.33
	3)	8.49	6	6	62.65	64.37	64.37	63.88	64.81	63.47	19.58	19.58	19.58	10.42	8.72	10.48
	4)	12.17	9.6	9.26	63.25	64.09	65.33	63.61	61.55	62.33	22.72	22.72	22.72	10.31	10.33	10.44
	5)	18.55	12.05	13.41	70.05	74.76	71.87	64.19	60.34	64.59	26.54	26.23	25.62	11.53	11.57	11.9
	6)	20.54	19.83	19.48	61.97	63.32	64.39	64.7	63.39	62.69	26.12	26.54	26.78	10.29	10.32	10.36
	7)	11.32	10.28	10.89	62.96	65.05	65.05	63.59	61.52	62.33	23.45	23.95	24.11	10.27	10.28	10.4
	8)	20.24	13.9	13.09	68.19	72.91	69.87	64.21	60.35	64.59	26.57	26.26	25.62	11.55	11.59	11.9
	9)	14.66	13.97	13.09	63.15	64.52	65.62	64.71	63.57	62.7	19.26	19.52	19.56	10.48	10.51	10.55
	10)	17.01	14.82	11.01	62.66	64.74	64.74	63.59	61.63	62.3	26.12	26.3	25.26	10.22	10.23	10.35
	11)	16.16	16.04	16.29	62.04	63.39	64.46	64.64	63.45	62.63	23.89	24.37	24.86	10.3	10.33	10.37
	12)	16.91	10.27	14.74	70.63	75.37	72.47	64.19	60.34	64.57	23.8	23.52	23.8	11.62	11.66	12
	13)	12.34	12.71	12.43	62.36	63.72	64.8	62.72	61.52	61.71	21.67	22.28	22.59	10.35	10.38	10.42
	14)	15.27	13.07	11.6	62.1	63.46	64.53	63.74	62.59	61.53	23.62	23.3	23.3	10.31	10.34	10.38
	15)	24.6	22.92	21.37	61.66	60.82	62.9	62.51	63.61	61.62	28.39	28.73	29.07	10.2	10.25	10.26
	16)	23.35	24.09	22.52	65.15	64.28	66.41	62.51	63.57	61.57	21.9	21.9	22.16	10.44	10.48	10.5
	17)	13.07	11.17	10.9	62.59	63.96	65.04	64.69	63.52	62.7	21.04	21.04	21.33	10.39	10.42	10.46
	18)	12.71	12.58	12.91	61.6	62.94	64.01	64.39	63.48	62.71	24.39	24.91	25.43	10.22	10.26	10.3
	19)	10.27	8.41	10.83	67.07	71.73	68.89	64.19	60.34	64.59	27.28	28.52	28.17	11.37	11.41	11.74
	20)	22.35	22.45	22.08	62.23	63.59	64.67	64.78	63.55	62.73	25.28	25.59	25.9	10.33	10.36	10.4

## Sheet: Лист7
	Changes in LDG activity in blood serum of the group A representatives (Ra=0.64) in conditions of 2-month power training, n = 20
		Basal data					After 2 months of training
		Before training	After training				Before training	After training
	1)	321	505			1)	457	403
	2)	379	471			2)	524	489
	3)	412	554			3)	437	474
	4)	374	480			4)	320	423
	5)	321	505			5)	460	406
	6)	379	471			6)	521	486
	7)	412	554			7)	437	474
	8)	374	480			8)	320	423
	9)	321	505			9)	459	405
	10)	377	469			10)	524	489
	11)	414	556			11)	437	474
	12)	374	480			12)	318	421
	13)	321	505			13)	458	404
	14)	376	468			14)	524	489
	15)	412	554			15)	437	474
	16)	374	480			16)	319	422
	17)	324	509			17)	455	400
	18)	379	471			18)	524	489
	19)	410	552			19)	437	474
	20)	376	482			20)	323	436

## Sheet: Лист8
	Changes in LDG activity in blood serum of the group B representatives (Ra=0.72) in conditions of 2-month power training, n = 20
		Basal data					After 2 months of training
		Before training	After training				Before training	After training
	1)	400	526			1)	389	433
	2)	373	438			2)	256	309
	3)	396	314			3)	422	385
	4)	369	491			4)	447	390
	5)	390	516			5)	379	423
	6)	383	448			6)	266	319
	7)	393	311			7)	429	392
	8)	372	493			8)	440	383
	9)	498	524			9)	385	433
	10)	375	438			10)	260	313
	11)	398	316			11)	400	381
	12)	369	491			12)	447	390
	13)	405	530			13)	389	433
	14)	373	438			14)	278	331
	15)	391	309			15)	422	385
	16)	360	482			16)	447	390
	17)	400	526			17)	389	411
	18)	373	438			18)	260	309
	19)	405	324			19)	422	386
	20)	367	491			20)	443	389

## Sheet: Лист9
	Changes in creatinine concentration in blood serum of the group A representatives (Ra=0.64) in conditions of 2-month power training, n = 20
		Basal data					After 2 months of training
		Before training	After training				Before training	After training
	1)	79	81			1)	82	89
	2)	89	92			2)	81	93
	3)	85	80			3)	87	95
	4)	88	82			4)	94	102
	5)	80	82			5)	82	89
	6)	86	89			6)	79	93
	7)	88	83			7)	89	93
	8)	89	83			8)	92	104
	9)	79	81			9)	82	89
	10)	85	88			10)	79	93
	11)	85	80			11)	91	96
	12)	89	83			12)	94	103
	13)	83	84			13)	82	89
	14)	89	92			14)	79	93
	15)	85	80			15)	86	90
	16)	89	83			16)	94	104
	17)	79	81			17)	85	92
	18)	89	89			18)	79	93
	19)	85	83			19)	89	93
	20)	89	83			20)	94	104

## Sheet: Лист10
	Changes in creatinine concentration in blood serum of the group B representatives (Ra=0.72) in conditions of 2-month power training, n = 20
		Basal data					After 2 months of training
		Before training	After training				Before training	After training
	1)	68	68			1)	89	102
	2)	101	100			2)	107	114
	3)	81	67			3)	96	98
	4)	89	94			4)	105	109
	5)	72	74			5)	87	100
	6)	95	94			6)	107	114
	7)	84	70			7)	98	100
	8)	86	91			8)	102	106
	9)	78	79			9)	89	102
	10)	91	87			10)	107	114
	11)	83	70			11)	99	102
	12)	89	94			12)	104	108
	13)	68	68			13)	90	102
	14)	98	97			14)	104	110
	15)	80	69			15)	96	98
	16)	89	92			16)	105	109
	17)	70	68			17)	93	106
	18)	99	100			18)	102	109
	19)	81	68			19)	101	103
	20)	90	93			20)	105	109

[truncated: 10 more sheets: Лист11, Лист12, Лист13, Лист14, Лист15, Лист16, Лист17, Лист18, Лист19, Лист20]
